# Supplementary material for: The Venom Gland Transcriptome of Latrodectus tredecimguttatus Revealed by Deep Sequencing and cDNA Library Analysis
Source: PubMed Central journal article supplement (PMC3842942; doi:10.1371/journal.pone.0081357), 2013-11-28
Supplement: pone.0081357.s001.pdf [file pone.0081357.s001.pdf]

## Legends for File S1

**Figure S1: The distribution of EST sequences in different GO categories**

**Figure S2: Distribution of the length of identified transcripts**

**Figure S3: Scatter plots of RPKM distribution of genes in the KEGG classes.**

**Figure S4: The mapping of identified transcripts/proteins (marked as red) in the spliceosome pathway of KEGG database**

**Figure S5: The mapping of identified transcripts /proteins (marked as red) in the pathway of protein process in endoplasmic reticulum in KEGG database.**

**Figure S6: Sequence characteristics of members in orphan families.** Sequence characteristics of members in orphan families. The potential toxins, which haven't homologue's function annotations, are classified into orphan families including two groups: one comprises toxins predicted from Cys patterns, and the other is based on sequence homology with known toxins containing domains. Within Cys patterns, the char “#” represents any three amino acids other than Cys. For other toxins, the domain architectures were predicted by the SMART and Pfam servers [59,60]. The character “-F” appended to protein ID numbers indicates that these sequences are fragments but not full-length proteins. The abbreviations of domain names are as follow: EGF (SMART ID: SM00181); KU (SMART ID: SM00131), glyco\_hydro\_56 (Pfam ID: PF01630); crust\_neurohorm (Pfam ID: PF01147).

**Figure S7: The abundance of toxin families in different functional categories.** Bars represent toxin families clustered based on their functional characteristics. The sum of RPKM values for each class and category are labeled. Neurotoxins including the ANK superfamily, the SCP family and the lycotoxin family; Assistant toxins including theriditoxin family; Proteases including ctenitoxin family; Function unknown toxins including scorpion toxin like family and the orphan family.

**Figure S8: Phylogenomic trees for trypsin, scorpion toxin-like, lycotoxin, ctenitoxin, SCP family.** Phylogenomic trees of trypsin, scorpion toxin-like, lycotoxin, ctenitoxin and SCP families. A. Ctenitoxin family; B. Trypsin family; C. Scorpion toxin-like family; D. SCP family; E. Lycotoxin family. The members of family and their homologues from other spiders are colored as blue and red on branches. For spider species that have transcriptomic data were highlighted by a green line.

**Figure S9: Phylogenetic tree of ANK superfamily toxins and their homologues from other 45 species.** Phylogenetic tree of ANK superfamily toxins and their homologues from other 45 species. Color code: pink for  $\alpha$ -LTX-Lt1a family1; blue for  $\alpha$ -LTX-Lt1a family2; green for  $\delta$ -LIT-Lt1a family; red for  $\alpha$ -LIT-Lt1a family; brown for ANK family. All phylogeny analyses are performed with MEGA 5.2 using Maximum Likelihood algorithm and 1000 bootstrap tests. The numbers on the branches are the supporting percentages of 1000 bootstrap tests.

**Table S1: RPKM distribution in the top ten of three GO namespaces.**

**Table S2: RPKM statistics of Ion channel in *Latrodectus tredecimguttatus*.**

**Table S3: The statistics of RPKM in KEGG pathway superclass.**

**Table S4: The RPKM list of sub-classes of the “Genetic information processing” category in KEGG database.**

**Table S5: List of toxins identified by sequence analyses.**

**Table S6: Known ion channel toxins in five venomous species.**

**Table S7: Full names/abbreviations’ and taxonomic classification of 18 species in phylogenetic analysis.**

**Table S8: Full names/abbreviations and taxonomic classification of 54 arthropod species.**

**Table S9: Full names/abbreviations and taxonomic classification of species shown in Figure S8.**

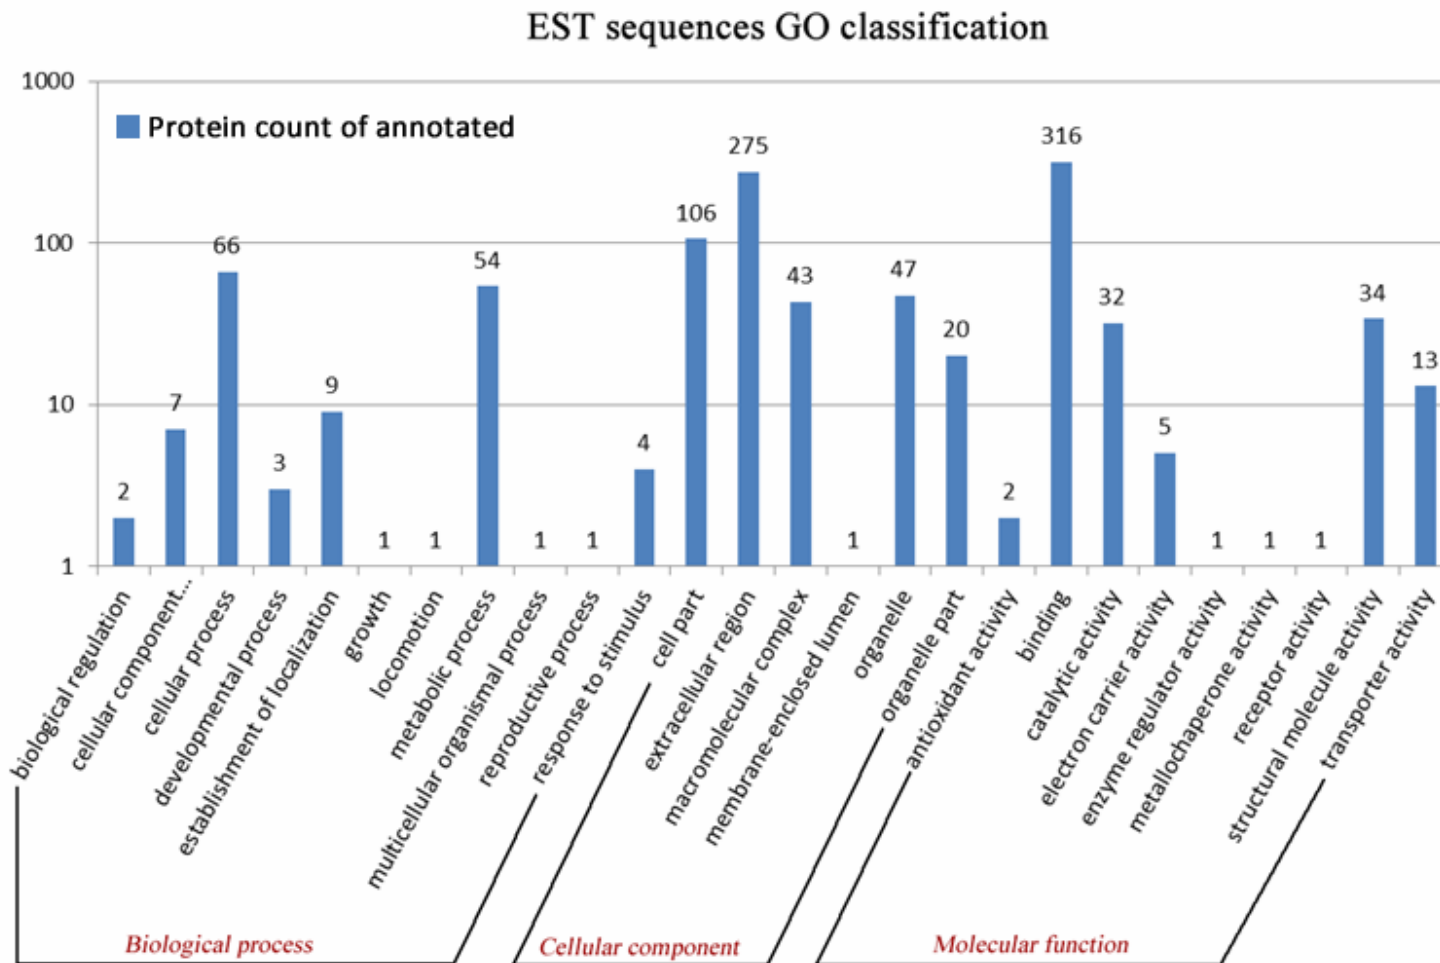

Figure S1

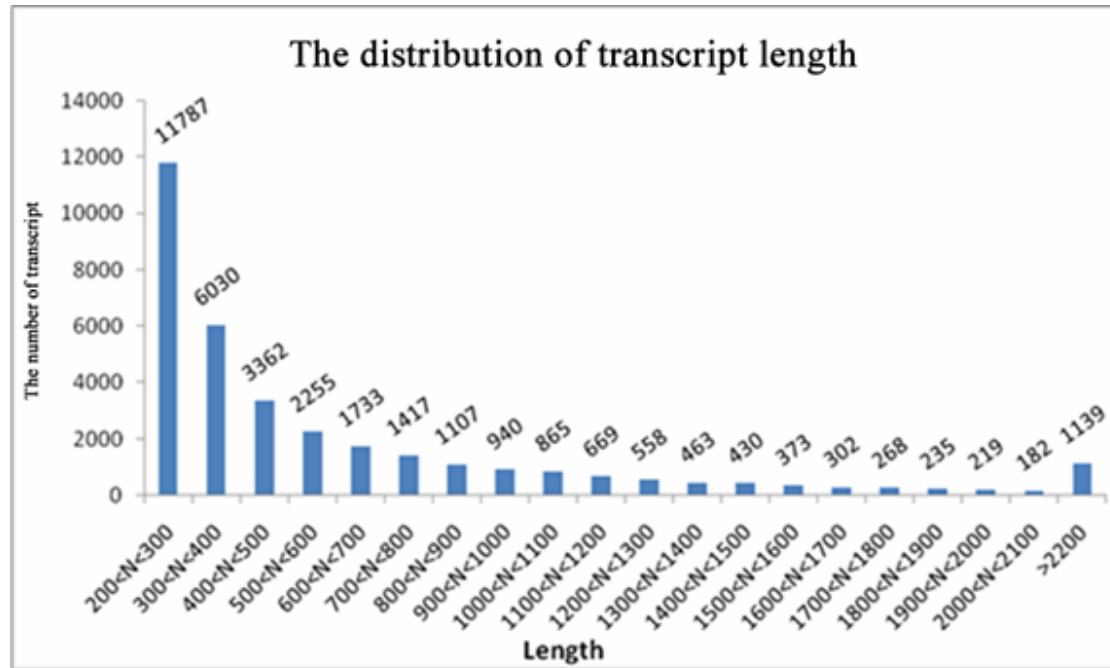

Figure S2

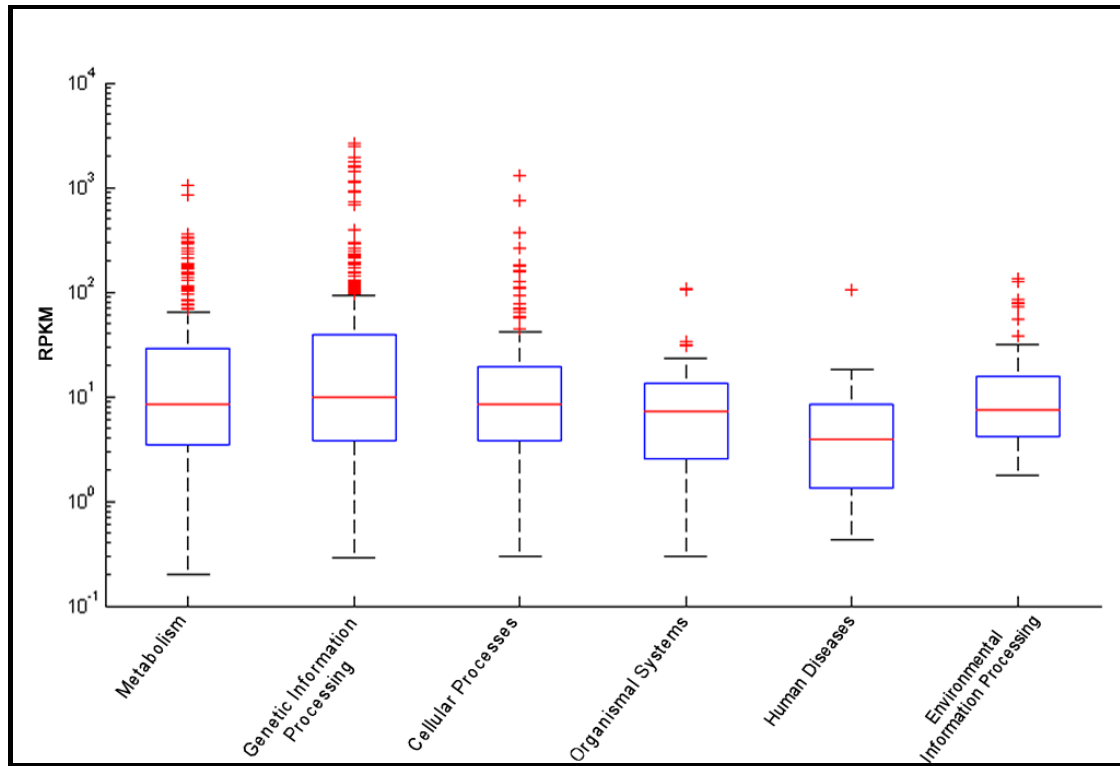

Figure S3

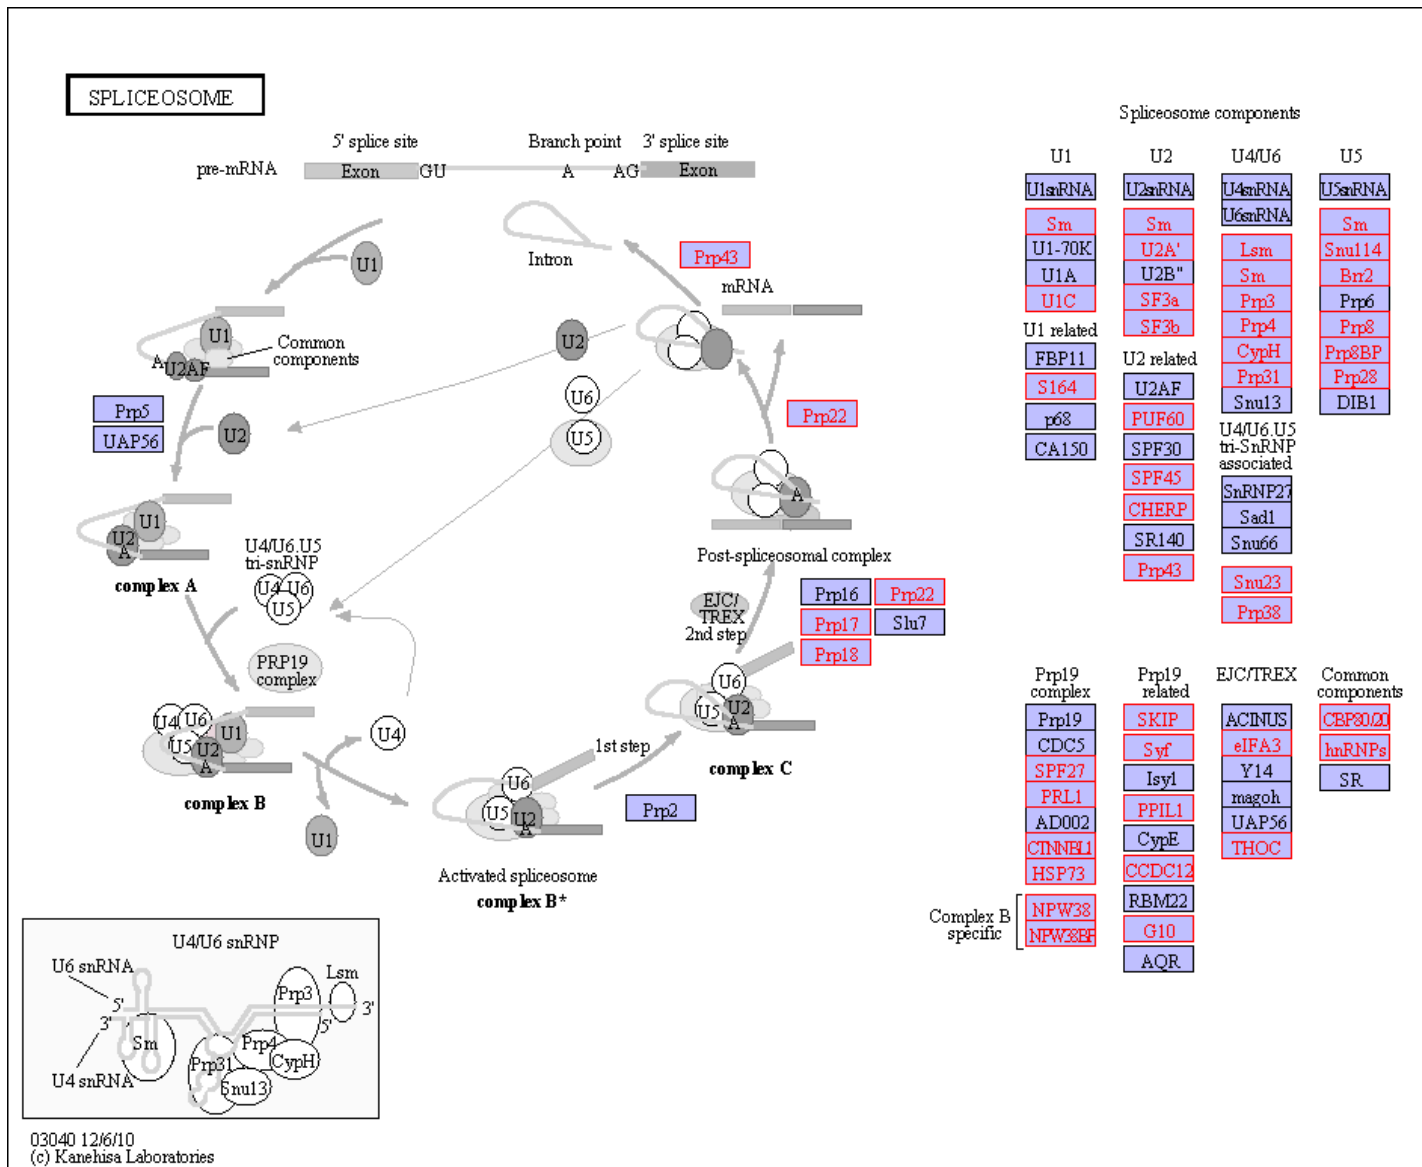

Figure S4

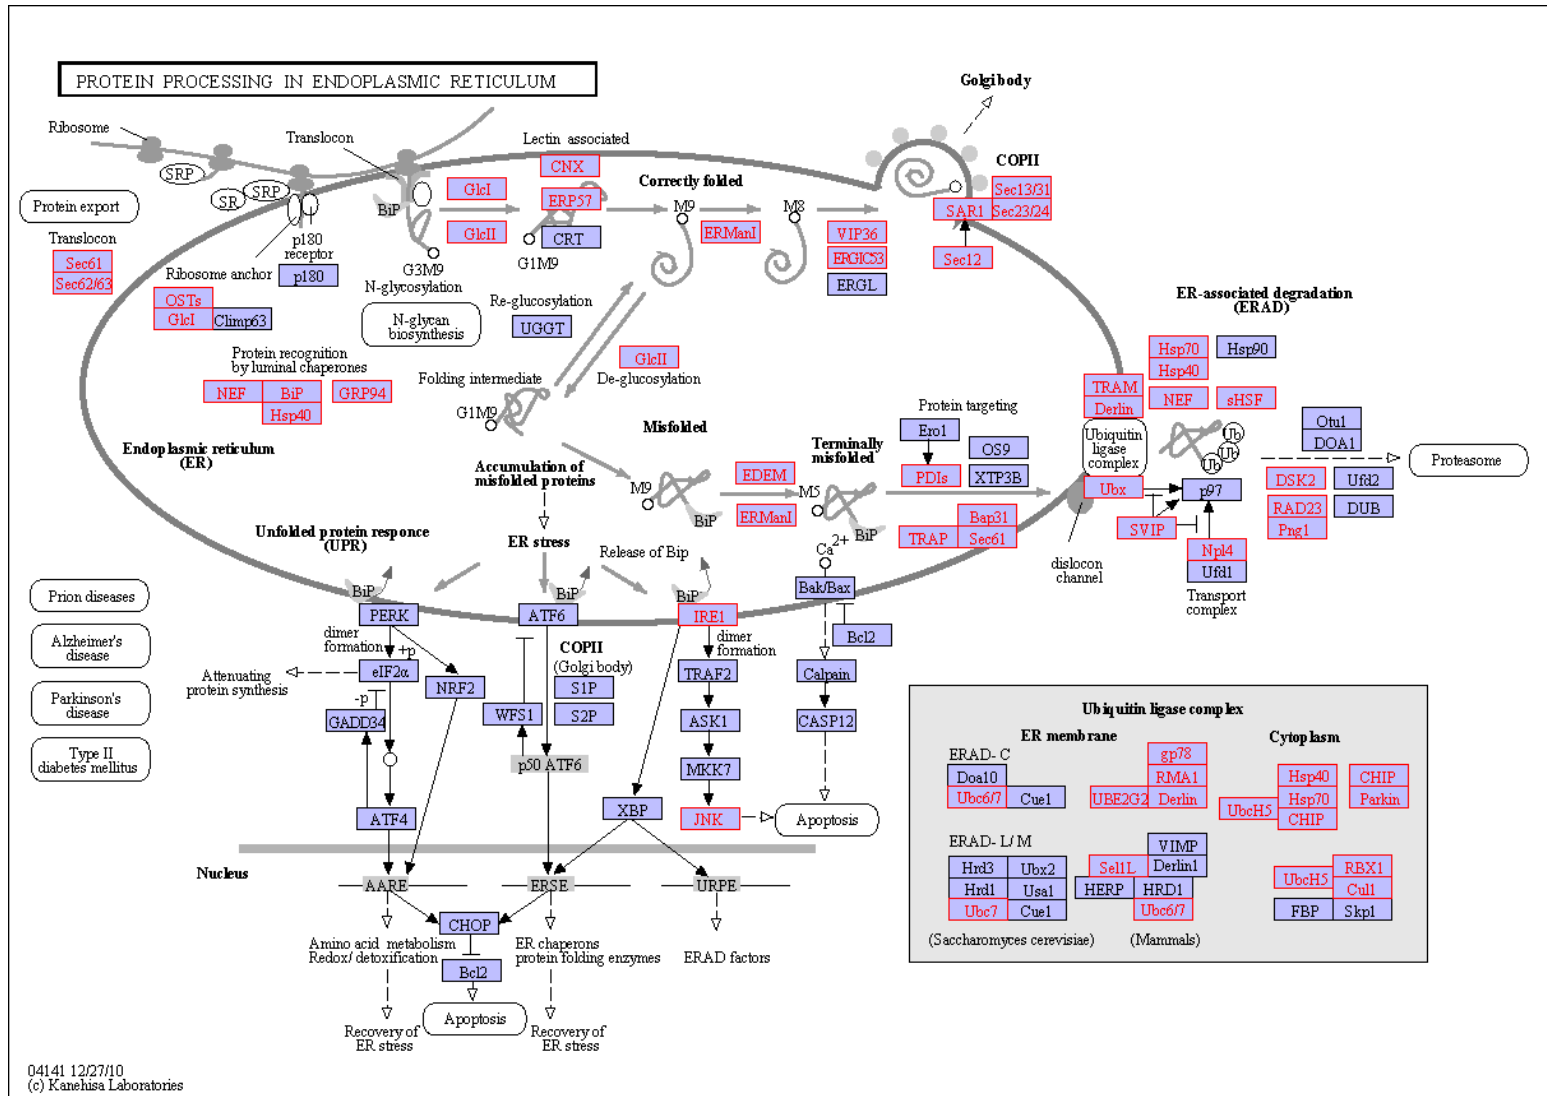

Figure S5

Orphan Family

Pattern for C#C####C#C

```
P_106983 -----MCGITKRNVSLLIIMPG-PPMQKFSS-----G----CKLSC--PNSALFPRPACPINCGLLLLTDLKNVSR
P_35263 ---MWSVYRCSLYYTKYCR---PN-----CVM-CTWKMESYVPSSEFC-YKCR---LRPRLT---
AT0000418 MPSVRSVACCLLWMLSVQLVTPGSPATAQLSGQRTARGPGSAICMCMACRLGQGHMYP--FCNCNGKRDVVSSMAV--
AT0000415 MPSVRSVTCCLLWMLSVQLVTPGSPATAQLSGQRTARGPGSAICMCMACRLGQGHMYP--FCNCNGKRDVVSSMAV--
```

Pattern for C##C##CC##C#C#C#C

```
P_53085 MSFYLGKRIIVVITLTHILVAGFCYRSFWRQRLRNVEDEEWEILENPRSSFCIKLDKNGSSEFR-CGNDNLCHG-FPH
P_119619 MNF-LAKRIHILLITLTHILVAGFCYRSFWRQRLRNVEDEEWEILENPRSSFCIKLDKNGSSEFR-CGNDNLCHG-FPH
AT0001551 MWL---KIQVFLLAITLITLIGCAE-F-----NSSPNN--PLIEEARA--CAGLYKRCGKASPCEDRPFCKDLAM
AT0001547 MWF---KIQVFLLAITLITLIGCAE-F-----NSSPNN--PLIEEDRAE--CAAVYERCGKGYKRCSEERPFCKDNIVM

P_53085 G-CYCVLEVPPELSEHFDGQIEWVEFEDNKEENKTVSQ
P_119619 G-CYCVLEVPPELSEHFDGQIEWVEFEDNKEENKTVSQ
AT0001551 GNCICKKKFFEPFG---GKK-----
AT0001547 DNGCCKKFFISLFG---FGK-----
```

Pattern for C##C##CC####C##C#####C#C#C#####C

```
P_11569 MKRALLAVSTIVLVAFFVVSARPPRPPPTIGHLEKPKRARDCCADCCCLSGALFKKGVCKLGTGDKCDGD-NHRRKG
AT0001638 MKRLSIFVFFCCICVMLCD-----AYGRCKRNSDCRASECCVNIPEARSTCKQYKQGGFFCAHMGKYNPIG

P_11569 EYVIFRCPCAGFTCEADVVKDTIYGMLKVNEKCVVSTGTPGNVITPAEETEGSNSSSESSSEEEI
AT0001638 EYINMCPGKGLKQLKQVSGPLALFRSRMLTCV-----
```

Pattern for C#C##C##C#C#C#C

```
P_92983 -----MCCRFLWLT-----FKISGCCQSLIVKRSQ--SCRFECLIKRQGL-FCLPRKQVCRRSIRSCL
AT0001669 MKVTLIAILLCAAVLVHTTTAAEELEESQLMEVGMPTDLAAVDEERLFECSISCFIEKKGE-SCKPK-KCKGGWK-CKF
AT0001674 MKVTLIAILLCAAVLVHTTTAAEELEESQLMEVGMPTDLAAVDEERLFECSISCFIEKKGE-SCKPK-KCKGGWK-CKF

P_92983 RIVKCS--
AT0001669 N--MCKVK
AT0001674 N--MCKVK
```

Pattern for C#C##C#C

```
P_47029 MHFVLYVLTVNIKPKIRCFLYMRHSIV--CICL--SVLILKCSR-CW---
P_96151 MHFVLYVLTVNIKPKIRCFLYMRHSIV--CICL--SVLILKCSR-C---
AT0001947 ---MISMLRCISIFLSVLLITGYEIVPVMS--CCK--APETALCARRCQOHG
AT0000047 ---MISMLRCISIFLSVLLITGYEIVPVMS--CCK--APETALCARRCQOHG
AT0000779 ---MISMLRCITFFLSVLLITGYEIVPTMSIKCCKRHHVIKPHICRKCCKNG
```

Pattern for C##C##CC#C##C

```
P_20559 -MGSRYWMSSSYFKRNY-----SCHYRYSNCRKR-ACCI-CFKRHSNSVGLW
AT0002696 IAADDSDRLKRFSSRKRMRDGMNLTKNTKRCCLPPLSICTMDDDCDDCIL-FLCLVIS--
AT0002493 IAADDSDRLKRFSSRKRMRDGMNLTKNTEEGCLPPLSICTMADDDCCDCIL-FLCLVSP--
```

# is a symbolize with any three amino acid except Cys

Un-characteristic potential toxin

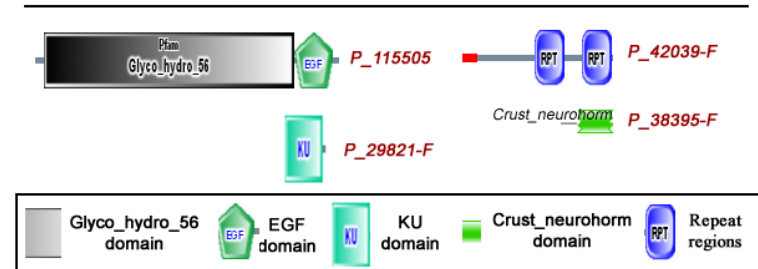

Figure S6



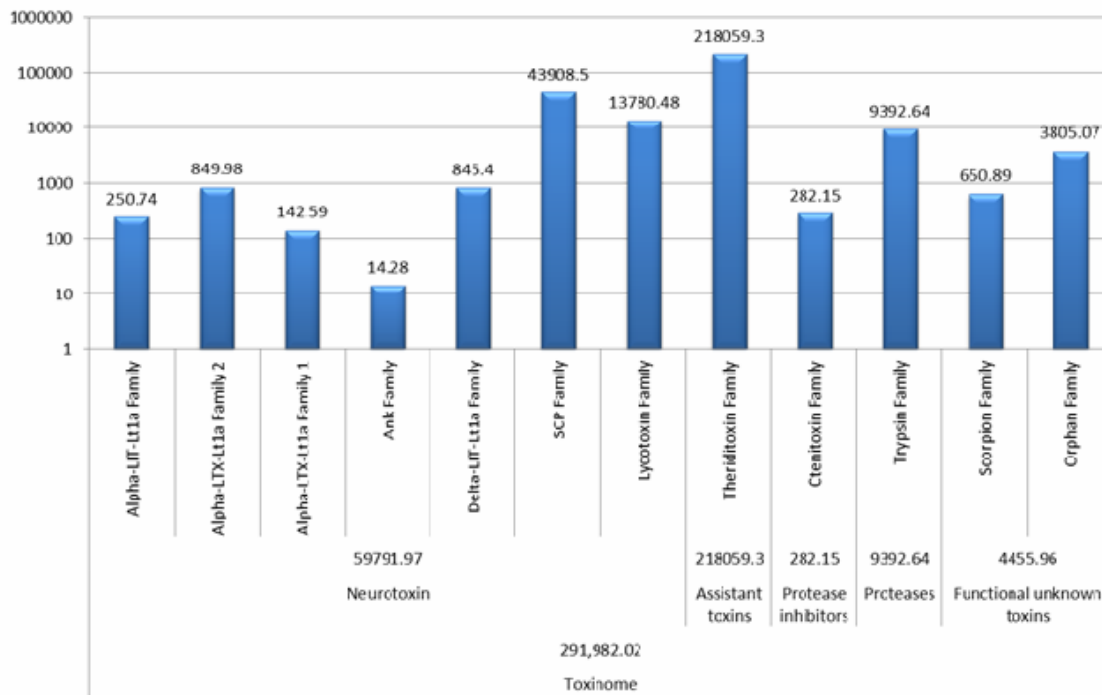

**Figure S7**

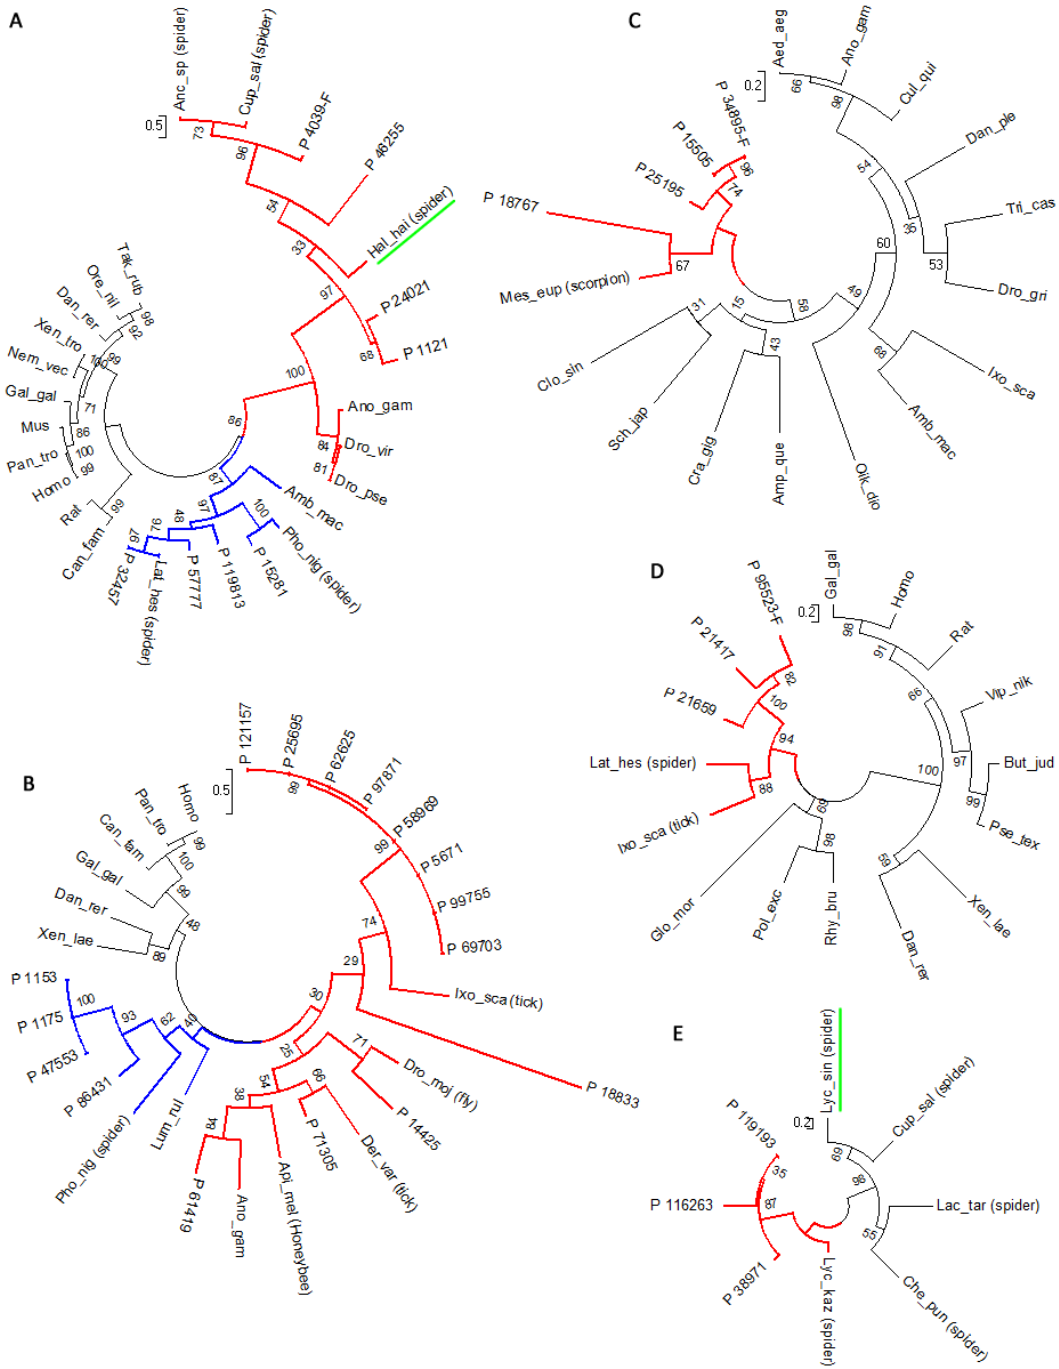

Figure S8

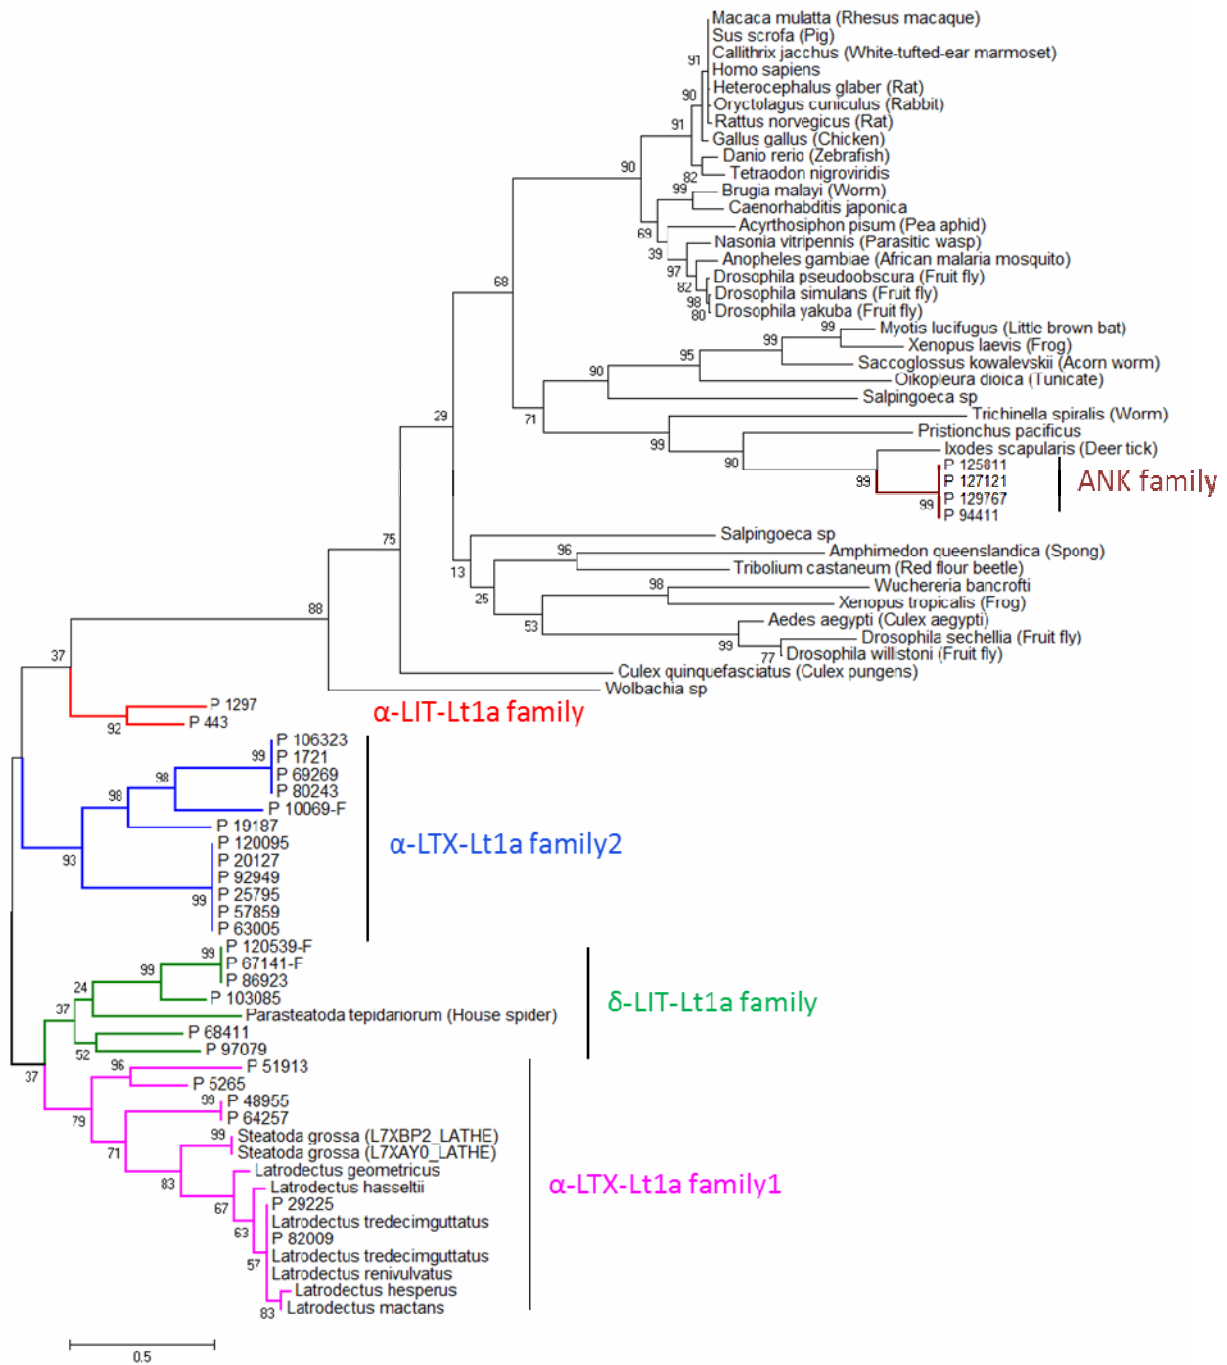

Figure S9

**Table S1.** RPKM distribution in the top ten GO items in three GO namespaces

| Biological process namespace           |       |          | Cellular component namespace                       |       |          | Molecular function namespace       |       |          |
|----------------------------------------|-------|----------|----------------------------------------------------|-------|----------|------------------------------------|-------|----------|
| GO Item                                | Count | RPKM     | GO Item                                            | Count | RPKM     | GO Item                            | Count | RPKM     |
| Translation                            | 222   | 101254.5 | Extracellular region                               | 69    | 87229.42 | Neuropeptide hormone activity      | 4     | 218072.3 |
| Proteolysis                            | 183   | 29747.34 | Ribosome                                           | 202   | 99301.79 | Structural constituent of ribosome | 214   | 106616   |
| Electron transport chain               | 6     | 11005.62 | Integral to membrane                               | 617   | 54733.82 | ATP binding                        | 622   | 24843.5  |
| Transmembrane transport                | 96    | 10427.08 | Cytoplasm                                          | 272   | 23632.59 | Metalloendopeptidase activity      | 48    | 17527.55 |
| ATP synthesis coupled proton transport | 16    | 10399.12 | Mitochondrial inner membrane                       | 29    | 17699    | Oxygen transporter activity        | 16    | 17100.38 |
| Transport                              | 47    | 7432.82  | Respiratory chain                                  | 6     | 12817.73 | Electron carrier activity          | 82    | 16007.03 |
| Aerobic respiration                    | 1     | 6966.76  | Small ribosomal subunit                            | 16    | 8400.76  | Calcium ion binding                | 158   | 15046.09 |
| Chitin metabolic process               | 12    | 5714.95  | Eukaryotic translation elongation factor 1 complex | 7     | 8236.08  | Oxidoreductase activity            | 117   | 14029.13 |
| Translational elongation               | 9     | 5654.64  | Mitochondrion                                      | 36    | 8214.48  | Binding                            | 333   | 13876.24 |
| GTP biosynthetic process               | 5     | 5213.21  | Membrane                                           | 239   | 7967.85  | RNA binding                        | 182   | 13527.49 |

**Table S2.** RPKM statistics of ion channels in *Latrodectus tredecimguttatus*

| <b>Class Name</b>     | <b>Ion channel Name</b>                                                                                  | <b>Attacked by spider toxin</b> | <b>RPKM</b> | <b>RPKM Count</b> |
|-----------------------|----------------------------------------------------------------------------------------------------------|---------------------------------|-------------|-------------------|
| <b>Cation Channel</b> | Novel protein similar to vertebrate calcium channel voltage-dependent alpha 2/delta subunit 2 (CACNA2D2) | Unknown                         | 4.13        | <b>162.86</b>     |
|                       | Potassium channel protein putative                                                                       | Unknown                         | 12.08       |                   |
|                       | Potassium channel putative                                                                               | Unknown                         | 2.26        |                   |
|                       | Regulator of ATP-sensitive K <sup>+</sup> channels putative                                              | Unknown                         | 91.89       |                   |
|                       | Cyclic nucleotide-gated cation channel                                                                   | Unknown                         | 1.05        |                   |
|                       | Transient receptor potential cation channel protein 4                                                    | Unknown                         | 1.45        |                   |
|                       | Trimeric intracellular cation channel type A putative                                                    | Unknown                         | 40.27       |                   |
|                       | Voltage-dependent calcium channel subunit alpha-2/delta-3                                                | Unknown                         | 4.68        |                   |
|                       | Inward rectifier K <sup>+</sup> channel putative                                                         | Unknown                         | 2.54        |                   |
|                       | Voltage-gated hydrogen channel putative                                                                  | Unknown                         | 2.51        |                   |
| <b>Anion Channel</b>  | Chloride channel putative                                                                                | Unknown                         | 10          | <b>970.65</b>     |
|                       | Chloride channel protein 3                                                                               | Unknown                         | 4.26        |                   |
|                       | Glutamate gated chloride channel                                                                         | Unknown                         | 6.23        |                   |
|                       | pH-sensitive chloride channel                                                                            | Unknown                         | 4.16        |                   |
|                       | Voltage-dependent anion-selective channel putative                                                       | Unknown                         | 946         |                   |
| <b>Other</b>          | Potassium intermediate/small conductance calcium-activated channel subfamily N member 2                  | Unknown                         | 1.05        | <b>6.12</b>       |
|                       | Cyclic nucleotide-gated ion channel LCNG1                                                                | Unknown                         | 5.07        |                   |

**Table S3.** The statistics of RPKMs in KEGG pathway superclass

| <b>KEGG pathway superclass</b>       | <b>Pathway Number</b> | <b>RPKM (%)</b> | <b>Protein Number</b> | <b>Average RPKM</b> |
|--------------------------------------|-----------------------|-----------------|-----------------------|---------------------|
| Genetic Information Processing       | 21                    | 32142.33 (48%)  | 522                   | 61.57               |
| Metabolism                           | 75                    | 19924.51 (30%)  | 588                   | 33.88               |
| Cellular Processes                   | 11                    | 6168.96 (9%)    | 161                   | 38.31               |
| Human Diseases                       | 21                    | 5182.66 (8%)    | 40                    | 129.56              |
| Environmental Information Processing | 14                    | 3086.34 (4%)    | 86                    | 133.27              |
| Organismal Systems                   | 22                    | 764.83 (1%)     | 58                    | 13.18               |

**Table S4.** The RPKM list of sub-classes of the “Genetic information processing” category in KEGG database

| <b>Sub-class Name</b>                       | <b>RPKM</b> |
|---------------------------------------------|-------------|
| Ribosome                                    | 11166.9     |
| Protein processing in endoplasmic reticulum | 5193.12     |
| RNA transport                               | 4974.49     |
| Protein export                              | 2689.95     |
| Proteasome                                  | 1720.84     |
| Spliceosome                                 | 1183.85     |
| Ubiquitin mediated proteolysis              | 1168.3      |
| Ribosome biogenesis in eukaryotes           | 712.82      |
| mRNA surveillance pathway                   | 581.5       |
| Aminoacyl-tRNA biosynthesis                 | 421.24      |
| Nucleotide excision repair                  | 412.8       |
| RNA polymerase                              | 397.21      |
| RNA degradation                             | 373.73      |
| Basal transcription factors                 | 327.53      |
| Homologous recombination                    | 303.85      |
| SNARE interactions in vesicular transport   | 257.33      |
| DNA replication                             | 79.05       |
| Mismatch repair                             | 67.74       |
| Base excision repair                        | 53.79       |
| Sulfur relay system                         | 47.58       |
| Non-homologous end-joining                  | 8.71        |

| <b>Table S5: List of toxins identified by sequence analyses</b> |                                                              |                                                                                                                    |             |
|-----------------------------------------------------------------|--------------------------------------------------------------|--------------------------------------------------------------------------------------------------------------------|-------------|
| <b>Family Name</b>                                              | <b>Homologue/Conserved Domain</b>                            | <b>Protein ID</b>                                                                                                  | <b>RPKM</b> |
| <b>Alpha-LIT-Lt1a Family</b>                                    | Homologue: <a href="#">Alpha-LCT-Lt1a</a>                    | P_443                                                                                                              | 250.74      |
|                                                                 | Homologue: <a href="#">Alpha-LIT-Lt1a</a>                    | P_1297                                                                                                             |             |
| <b>Theriditoxin Family</b>                                      | Homologue: <a href="#">Alpha-latrotoxin-associated LMWP2</a> | P_66861                                                                                                            | 218059.3    |
|                                                                 | Homologue: <a href="#">Alpha-latrotoxin-associated LMWP</a>  | P_89055                                                                                                            |             |
| <b>Alpha-LTX-Lt1a Family 2</b>                                  | Homologue: <a href="#">Alpha-LTX-Lt1a</a>                    | P_51913, P_29225, P_124863-F, P_64257, P_48955, P_82009, P_5265                                                    | 849.98      |
| <b>Alpha-LTX-Lt1a Family 1</b>                                  | Homologue: <a href="#">Alpha-LTX-Lt1a</a>                    | P_120095, P_25795, P_1721, P_57859, P_20127, P_63005, P_92949, P_19187, P_10069-F, P_69269, P_106323, P_80243      | 142.59      |
| <b>Ank Family</b>                                               | Domain matching                                              | P_63979-F, P_77051, P_36165-F, P_73235, P_97059, P_87955, P_116129, P_127121, P_129767, P_125811, P_94411, P_77485 | 153.24      |
| <b>SCP Family</b>                                               | Homologue: <a href="#">Cysteine-rich secretory protein</a>   | P_21417, P_21659, P_95523-F, P_67749                                                                               | 44017.56    |
| <b>Delta-LIT-Lt1a Family</b>                                    | Homologue: <a href="#">Delta-LIT-Lt1a</a>                    | P_67141-F, P_97079, P_103085, P_86923, P_68411, P_120539-F                                                         | 845.4       |
| <b>Ctenitoxin Family</b>                                        | Domain matching                                              | P_46255                                                                                                            | 282.15      |
|                                                                 | Homologue: <a href="#">U24-ctenitoxin-Pn1a</a>               | P_32457, P_15281, P_119813, P_57777                                                                                |             |
|                                                                 | Homologue: <a href="#">U3-ctenitoxin-Asp1a</a>               | P_4039-F                                                                                                           |             |
|                                                                 | Homologue: <a href="#">U9-ctenitoxin-Pr1a</a>                | P_24021, P_86613-F                                                                                                 |             |
|                                                                 | Homologue: <a href="#">U19-ctenitoxin-Pn1a</a>               | P_1121                                                                                                             |             |
| <b>Trypsin Family</b>                                           | Domain matching                                              | P_5671, P_121157, P_99755, P_18833, P_14425, P_61419, P_25695, P_97871, P_62625, P_58969, P_69703, P_71305, P_1153 | 9392.64     |
|                                                                 | Homologue: <a href="#">Fibrinolytic enzyme</a>               | P_1175                                                                                                             |             |
|                                                                 | Homologue: <a href="#">Trypsin-7</a>                         | P_47553                                                                                                            |             |
|                                                                 | Homologue: <a href="#">U21-ctenitoxin-Pn1a</a>               | P_86431                                                                                                            |             |
| <b>Lycotoxin Family</b>                                         | Homologue: <a href="#">U1-aranetoxin-Av1a</a>                | P_29821-F                                                                                                          | 13781.7     |
|                                                                 | Homologue: <a href="#">U1-lycotoxin-Ls1hh</a>                | P_116263                                                                                                           |             |
|                                                                 | Homologue: <a href="#">U4-lycotoxin-Ls1a</a>                 | P_119193, P_38971                                                                                                  |             |
| <b>Scorpion Family</b>                                          | Homologue: <a href="#">Venom protein-2</a>                   | P_18767                                                                                                            | 650.89      |
|                                                                 | Homologue: <a href="#">Venom toxin-like peptide-6</a>        | P_15505, P_34895-F, P_25195                                                                                        |             |
| <b>Orphan Family</b>                                            | Scaffold matching                                            | P_92983, P_96151, P_106983, P_35263, P_47029, P_11569, P_53085, P_119619, P_20559                                  | 3816.79     |
|                                                                 | Homologue: <a href="#">Orcokinin-like peptide</a>            | P_42039-F                                                                                                          |             |
|                                                                 | Homologue: <a href="#">Ion transport peptide</a>             | P_38395-F                                                                                                          |             |
|                                                                 | Homologue: <a href="#">Venom hyaluronidase</a>               | P_115505                                                                                                           |             |

Note, known toxins are colored by blue; Toxins and toxin families that were firstly reported in are colored by red and green, respectively



---

**Table S6.** Known ion channel toxins in five venom species

|             | Sodium channel | Potassium channel | Calcium channel |
|-------------|----------------|-------------------|-----------------|
| Scorpion    | 263            | 188               | 47              |
| Snake       | 20             | 32                | 50              |
| Spider      | 188            | 62                | 101             |
| Sea anemone | 67             | 29                | 0               |
| Cone        | 108            | 39                | 76              |

**Table S7.** Full names/abbreviations' and taxonomic classification of 18 species

|                   |                                                                   |
|-------------------|-------------------------------------------------------------------|
| <b>Amphibia</b>   | Xenopus tropicalis (Western clawed frog) [Xen_tro]                |
| <b>Arthropoda</b> | Anopheles gambiae (African malaria mosquito) [Ano_gam]            |
|                   | Apis mellifera (Honeybee) [Api_mel]                               |
|                   | Drosophila melanogaster (Fruit fly) [Dro_mel]                     |
|                   | Latrodectus tredecimguttatus (Lat_tre)                            |
| <b>Aves</b>       | Gallus gallus (Chicken) [Gal]                                     |
| <b>Fungi</b>      | Dictyostelium discoideum (Slime mold) [Dic_dis]                   |
|                   | Dictyostelium fasciculatum (strain SH3) (Slime mold) [Dic_fas]    |
| <b>Mammalia</b>   | Canis familiaris (Dog) (Canis lupus familiaris) [Can_fam]         |
|                   | Mus musculus (Mouse) [Mus]                                        |
|                   | Pan troglodytes (Chimpanzee) [Pan_tro]                            |
|                   | Homo sapiens (Human) [Homo]                                       |
|                   | Pan troglodytes (Chimpanzee)[Pan_tro]                             |
|                   | Rattus norvegicus (Rat) [Rat]                                     |
| <b>Nematoda</b>   | Caenorhabditis elegans [Cae_ele]                                  |
| <b>Teleostei</b>  | Danio rerio (Zebrafish) (Brachydanio rerio) [Dan_rer]             |
|                   | Takifugu rubripes (Japanese pufferfish) (Fugu rubripes) [Tak_rub] |
| <b>Other</b>      | Ciona intestinalis (Transparent sea squirt) [Cio_int]             |

**Table S8.** Full names/abbreviations and taxonomic classification of 54 arthropod species

| Lineage    |             |                                                                                                                                                                                                                                                   | Species                                                                                                                                                                                                                                                                                                                                                                                                                                                                      |
|------------|-------------|---------------------------------------------------------------------------------------------------------------------------------------------------------------------------------------------------------------------------------------------------|------------------------------------------------------------------------------------------------------------------------------------------------------------------------------------------------------------------------------------------------------------------------------------------------------------------------------------------------------------------------------------------------------------------------------------------------------------------------------|
| Arthropoda | Mandibulata | Pancrustacea                                                                                                                                                                                                                                      | <b>Hexapoda</b><br>Metajapyx subterraneus (Jap); Eumesocampa frugilis (Efr); Orchesella imitari (Oim); Ischnura verticalis(Ive); Plathemis lydia (Lly); Hexagenia limbata (May); Periplaneta americana (Pam); Acheta domesticus (Ado); Nicoletia meinerti (Nme); Ctenolepisma lineata (Cli); Pedetontus saltator (Psa); Machiloides banksi (Mba); Ephemerella inconstans (Ein);                                                                                              |
|            |             |                                                                                                                                                                                                                                                   | <b>Crustacea</b><br>Neogonodactylus oerstedii (Neo); Libinia emarginata (Lem); Armadillidium vulgare (Avu3); Eurytemora affinis (Eaf); Acanthocyclops vernalis (A369); Daphnia magna (Dma); Lynceus sp. (Lyn); Artemia salina (Asa3); Streptocephalus seali (ufs); Loxothylacus texanus (Lox); Semibalanus balanoides (Bba); Chthamalus fragilis (Cfr); Lepas anserifera (Lean)                                                                                              |
|            |             |                                                                                                                                                                                                                                                   | <b>Oligostraca</b><br>Skogsbergia leneri (Skle); Argulus sp. (Arg2); Armillifer armillatus (Aar)                                                                                                                                                                                                                                                                                                                                                                             |
|            |             | <b>Myriapoda</b><br>Scutigera coleoptrata (Scol); Eurypauropus spinosus (Eury); Craterostigma tasmanianus (Ctas2); Hanseniella sp.(Han2); Scutigera sp.(Scu3); Polyxenus fasciculatus (Pol2); Abacion magnum (Ama); Polyzonium germanicum (Pge2); |                                                                                                                                                                                                                                                                                                                                                                                                                                                                              |
|            | Chelicerata |                                                                                                                                                                                                                                                   | <b>Arachnida &amp; Merostomata</b><br>Prokoenia wheeleri (Pwh); Dinothrombium pandorae (Din2); Leiobunum verrucosum (Lnig); Amblyomma sp. (Amb2); Idiogaryops pumilis (Ipum); Carcinoscorpius rotundicauda (Cro2); Cryptocellus centralis (Crp2); Eremocosta gigasella (Egig); Hadrurus arizonensis (Hari); Heterometrus spinifer (Hsp); Aphonopelma chalcodes (Ach); Phrynos marginemaculatus (Pma2); Stenochrus portoricensis (Stp); Latrodectus tedeimiguttatus (Lat_tre) |
|            |             |                                                                                                                                                                                                                                                   | <b>Pycnogonida</b><br>Achelia echinata (Aeli); Endeis laevis (Ele); Amothea hilgendorfi (Ahi)                                                                                                                                                                                                                                                                                                                                                                                |

**Table S9.** Full names/abbreviations and taxonomic classification of species shown in Figure S8.

|                   |                                                                                                                                                                                                                                                                                                                                                                                                                                                                                                                                                                                                                                                                                                                                                                                                                                                                                                                 |
|-------------------|-----------------------------------------------------------------------------------------------------------------------------------------------------------------------------------------------------------------------------------------------------------------------------------------------------------------------------------------------------------------------------------------------------------------------------------------------------------------------------------------------------------------------------------------------------------------------------------------------------------------------------------------------------------------------------------------------------------------------------------------------------------------------------------------------------------------------------------------------------------------------------------------------------------------|
| <b>Amphibia</b>   | Xenopus tropicalis (Xen_tro)                                                                                                                                                                                                                                                                                                                                                                                                                                                                                                                                                                                                                                                                                                                                                                                                                                                                                    |
| <b>Arthropoda</b> | Anopheles gambiae (Ano_gam), Apis mellifera (Api_mel), Drosophila melanogaster (Dro_mel), Drosophila pseudoobscura pseudoobscura (Dro_pse), Amblyomma maculatum (Amb_mac), Haplopelma hainanum (Hap_hai), Phoneutria nigriventer (Pho_nig), Cupiennius salei (Cup_sal), Ancylozetes sp (Anc_sp), Latrodectus hesperus (Lat_hes), Lycosa singoriensis (Lyc_sin), Lachesana tarabaei (Lac_tar), Cheiracanthium punctorium (Che_pun), Lycosa kazakhstanicus (Lyc_kaz), Aedes aegypti (Aed_aeg), Tribolium castaneum (Tri_cas), Drosophila grimshawi (Dro_gri), Danaus plexippus (Dan_ple), Anopheles gambiae str (Ano_gam), Culex quinquefasciatus (Cul_qui), Ixodes scapularis (Ixo_sca), Amblyomma maculatum (Amb_mac), Crassostrea gigas (Cra_gig), Mesobuthus eupeus (Mes_eup), Butotus judaicus (But_jud), Glossina morsitans morsitans (Glo_mor), Rhynchium brunneum (Rhy_bru), Polistes exclamans (Pol_exc) |
| <b>Aves</b>       | Gallus gallus (Gal)                                                                                                                                                                                                                                                                                                                                                                                                                                                                                                                                                                                                                                                                                                                                                                                                                                                                                             |
| <b>Mammalia</b>   | Pan troglodytes (Chimpanzee), Mus musculus (Mus), Pan troglodytes (Chimpanzee), Rattus norvegicus (Rat), Homo sapiens (Homo), Canis familiaris (Dog)                                                                                                                                                                                                                                                                                                                                                                                                                                                                                                                                                                                                                                                                                                                                                            |
| <b>Trematoda</b>  | Schistosoma japonicum (Sch_jap), Clonorchis sinensis (Clo_sin)                                                                                                                                                                                                                                                                                                                                                                                                                                                                                                                                                                                                                                                                                                                                                                                                                                                  |
| <b>Teleostei</b>  | Danio rerio (Dan_rer) [Zebrafish], Oreochromis niloticus (Ore_nil), Takifugu rubripes (Tak_rub)                                                                                                                                                                                                                                                                                                                                                                                                                                                                                                                                                                                                                                                                                                                                                                                                                 |
| <b>Other</b>      | Nematostella vectensis (Nem_vec), Oikopleura dioica (Oik_dio), Amphimedon queenslandica (Amp_gue), Pseudonaja textilis (Pse_tex), Vipera nikolskii (Vip_nik)                                                                                                                                                                                                                                                                                                                                                                                                                                                                                                                                                                                                                                                                                                                                                    |
